# Supplementary material for: Highly efficient catalytic transfer hydrogenation of furfural over defect-rich amphoteric ZrO2 with abundant surface acid–base sites
Source: Royal Society of Chemistry journal article supplement (doi:10.1039/d0dt00055h), 2021-01-01
Supplement: d0dt00055h1.pdf [file d0dt00055h1.pdf]

## Supplementary Information

### Highly efficient catalytic transfer hydrogenation of furfural over defect-rich amphoteric ZrO<sub>2</sub> with abundant surface acid-base sites

Zekun Zhu<sup>+</sup>, Lingling Yang<sup>+</sup>, Changxuan Ke, Guoli Fan\*,  
Lan Yang, and Feng Li\*

*State Key Laboratory of Chemical Resource Engineering, Beijing Advanced Innovation Center  
for Soft Matter Science and Engineering, Beijing University of Chemical Technology, Beijing,  
100029, China*

\* To whom all correspondence should be addressed

Tel.: 8610-64451226; Fax: 8610-64425385.

E-mail: [fangl@mail.buct.edu.cn](mailto:fangl@mail.buct.edu.cn) (G. Fan); [Lifeng@mail.buct.edu.cn](mailto:Lifeng@mail.buct.edu.cn) (F. Li)

[+] *These authors contribute equally to this work.*

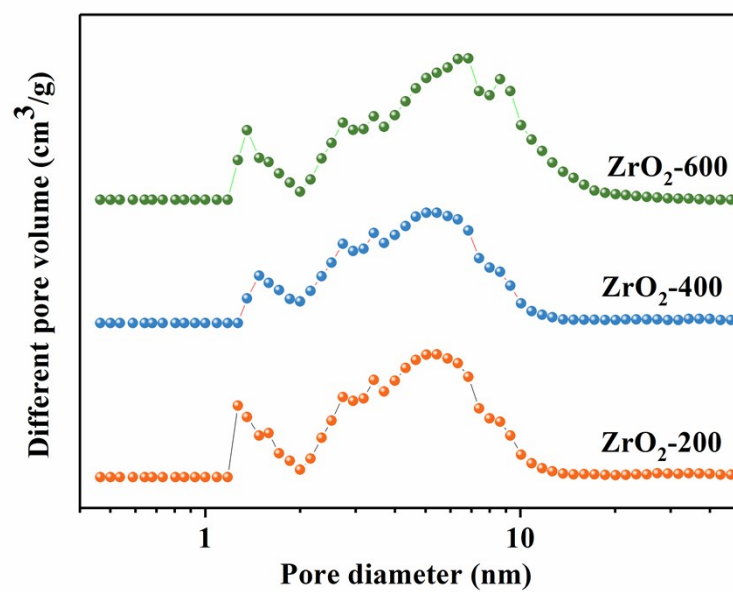

**Fig. S1** Pore size distribution of ZrO<sub>2</sub> calcinated at different temperature.

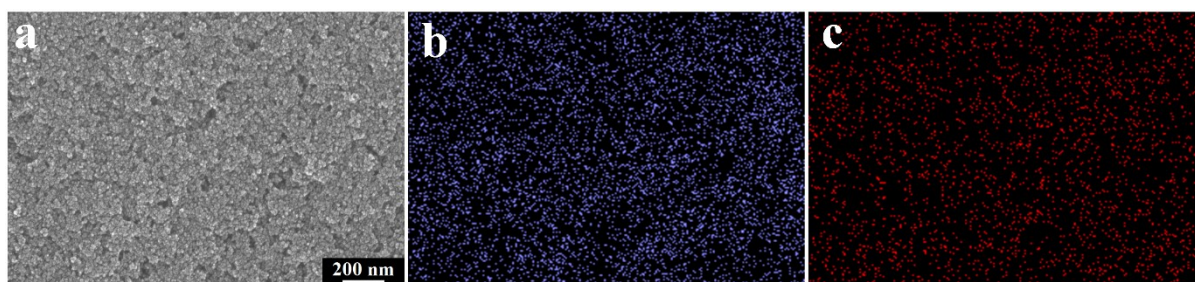

**Fig. S2** SEM image (a) of as-prepared ZrO<sub>2</sub>, and corresponding elemental mapping of Zr (b) and O (c).

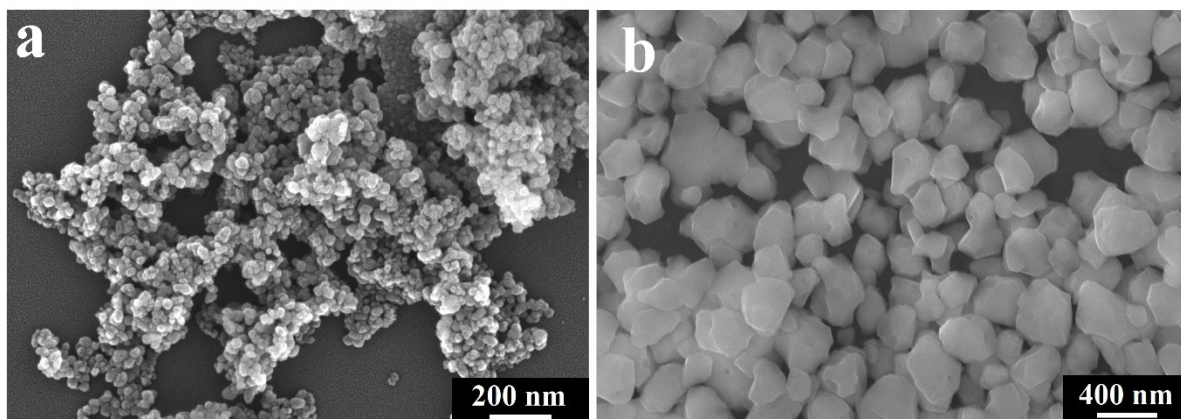

**Fig. S3** SEM images of  $ZrO_2$  samples:  $ZrO_2$ -S (a) and  $ZrO_2$ -C (b).

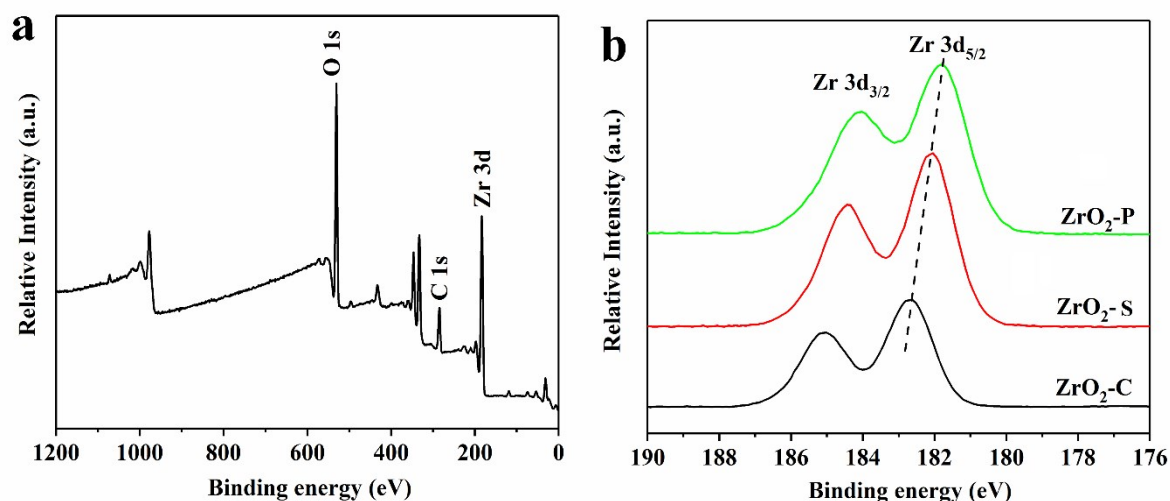

**Fig. S4** XPS survey of as-prepared  $ZrO_2$  sample (a) Zr 3d of  $ZrO_2$ -P,  $ZrO_2$ -S, and  $ZrO_2$ -C samples (b).

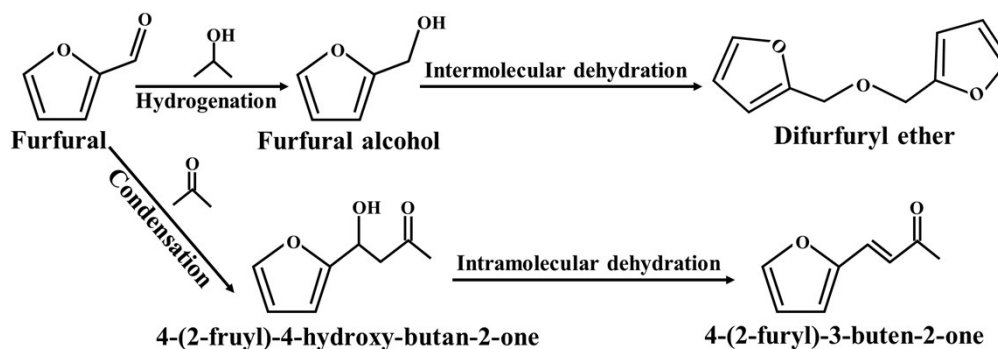

**Fig. S5** Possible reactions in the catalytic transfer hydrogenation of furfural over as-prepared defect-rich amphoteric  $ZrO_2$ .
